# Supplementary material for: Lymphopenic Community Acquired Pneumonia (L-CAP), an Immunological Phenotype Associated with Higher Risk of Mortality
Source: PubMed Central journal article supplement — eBioMedicine. 2017 Sep 21;24:231–6. doi: 10.1016/j.ebiom.2017.09.023 (PMC5652132; doi:10.1016/j.ebiom.2017.09.023), 2017-09-21
Supplement: mmc1.pdf [file mmc1.pdf]

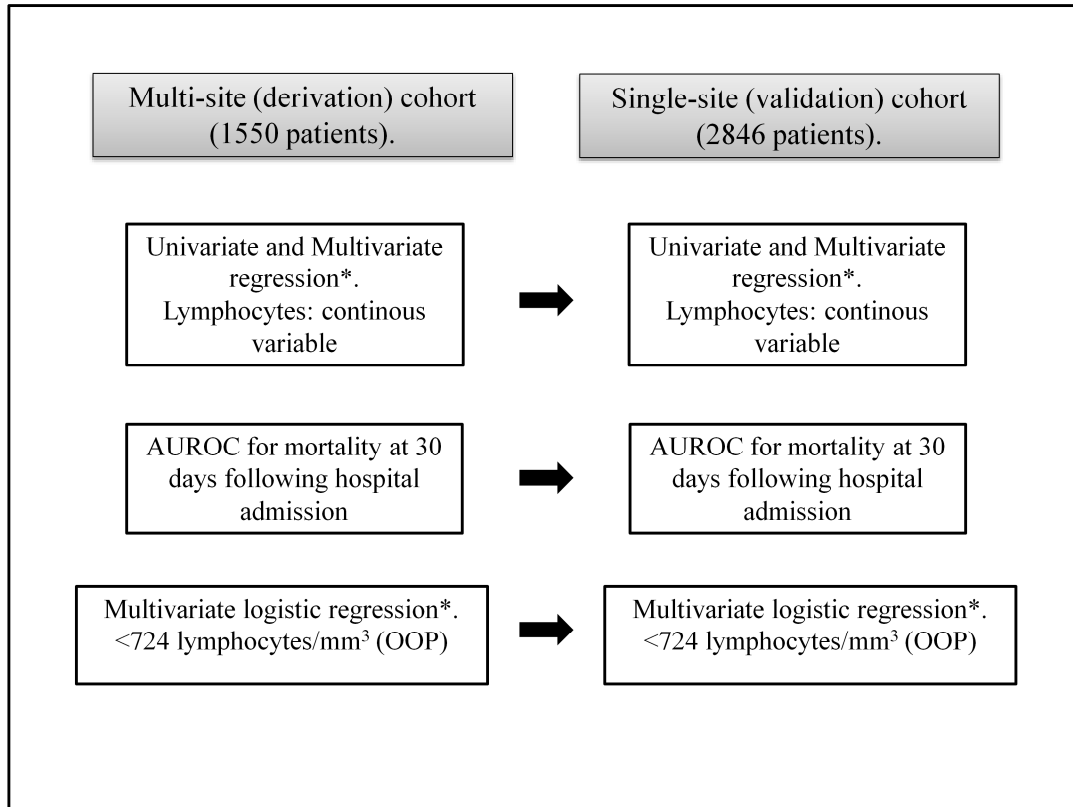

**Supplementary file 1: Flow chart depicting the analysis for mortality prediction at 30 days following hospital admission.**

Variables analyzed in the univariate logistic regression for mortality were the following ones: Age ( $\geq 65$  years), sex male, smoking, alcohol abuse, pneumococcal vaccine, influenza vaccine, oral steroids, inhaled steroids, antibiotic last month, cardiac disease, chronic renal failure, liver disease, diabetes mellitus, chronic pulmonary disease, neurological disease, initial ICU admission, CURB65 ( $\geq 3$ ), virus, appropriate antibiotic, complications: (acute renal failure, pleural effusion, mechanical ventilation, ARDS, septic shock) neutrophils (cells/mm<sup>3</sup>), lymphocytes (cells/mm<sup>3</sup>), reactive C protein.

Variables yielding a  $p < 0.1$  in the univariate regression analysis were further included in the multivariate one as adjusting variables: Multi-site (derivation) cohort (Cardiac disease, chronic renal failure, neurological disease, CURB65 ( $\geq 3$ ), initial ICU admission, appropriate antibiotic, lymphocytes (cells/mm<sup>3</sup>)). Single-site (validation) cohort: (Smoking, cardiac disease, chronic renal failure, neurological disease, CURB65 ( $\geq 3$ ), ARDS (complication), Virus, Initial ICU admission, Appropriate antibiotic, Lymphocytes (cells/mm<sup>3</sup>)).

Excluded variables, since they showed a significant correlation with another inclusive variable (Spearman correlation coefficient  $> 0.3$ ) were: Multi-site (derivation) cohort: (Age ( $\geq 65$  years), acute renal failure, ARDS, septic shock, mechanical ventilation). Single-site (validation) cohort: (Age ( $\geq 65$  years), acute renal failure, septic shock, mechanical ventilation).

|                                       | Characteristics           | Lymphocyte count (cell/mm <sup>3</sup> ) |                | <i>P</i> value |
|---------------------------------------|---------------------------|------------------------------------------|----------------|----------------|
|                                       |                           | < 724 (n=520)                            | ≥ 724 (n=1030) |                |
| <b>Demographic data and treatment</b> | Age (≥ 65 years)          | 196 (37.7)                               | 428 (41.6)     | 0.143          |
|                                       | Sex male                  | 342 (65.8)                               | 620 (60.2)     | 0.033          |
|                                       | Current smoking           | 96 (19.9)                                | 223 (22.9)     | 0.196          |
|                                       | Alcohol abuse             | 58 (11.2)                                | 73 (7.1)       | 0.007          |
|                                       | Pneumococcal vaccine      | 59 (11.3)                                | 119 (11.6)     | 0.904          |
|                                       | Influenza vaccine         | 213 (41)                                 | 422 (41)       | 0.997          |
|                                       | Oral steroids             | 27 (5.2)                                 | 45 (4.4)       | 0.465          |
|                                       | Inhaled steroids          | 111 (21.3)                               | 253 (24.6)     | 0.158          |
|                                       | Antibiotic last month     | 106 (20.4)                               | 278 (27)       | 0.018          |
| <b>Comorbidity</b>                    | Cardiac disease           | 176 (34.2)                               | 260 (25.4)     | <0.001         |
|                                       | Chronic renal failure     | 54 (10.5)                                | 84 (8.3)       | 0.141          |
|                                       | Liver disease             | 32 (6.3)                                 | 30 (2.9)       | 0.002          |
|                                       | Diabetes Mellitus         | 113 (22.2)                               | 224 (22)       | 0.915          |
|                                       | Chronic pulmonary disease | 139 (27.3)                               | 282 (27.8)     | 0.854          |
|                                       | Neurological disease      | 108 (21.3)                               | 146 (14.3)     | 0.001          |
| <b>Initial severity</b>               | Initial ICU admission     | 76 (14.6)                                | 55 (5.3)       | <0.001         |
|                                       | CURB65 (≥3)               | 110 (21.4)                               | 109 (10.7)     | <0.001         |
| <b>Complications and outcomes</b>     | Appropriate antibiotic    | 349 (84.7)                               | 700 (86.3)     | 0.448          |
|                                       | Acute renal failure       | 36 (6.9)                                 | 51 (5)         | 0.111          |
|                                       | Pleural effusion          | 41 (7.9)                                 | 54 (5.2)       | 0.041          |
|                                       | Mechanical ventilation    | 48 (9.6)                                 | 47 (4.7)       | <0.001         |
|                                       | ARDS                      | 34 (6.5)                                 | 22 (2.1)       | <0.001         |
|                                       | Septic shock              | 36 (6.9)                                 | 29 (2.8)       | <0.001         |
|                                       | Mortality at 30 days      | 41 (7.9)                                 | 31 (3)         | <0.001         |

**Supplementary file 2: Clinical characteristics of patients in the multi-site (derivation) cohort depending on the lymphocyte count.** Data presented as n (%). ICU: Intensive care unit, ARDS: Acute Respiratory Distress Syndrome.

|                                       | Characteristics           | Lymphocyte count (cell/mm <sup>3</sup> ) |                | <i>P</i> value |
|---------------------------------------|---------------------------|------------------------------------------|----------------|----------------|
|                                       |                           | < 724 (n=1014)                           | ≥ 724 (n=1832) |                |
| <b>Demographic data and treatment</b> | Age (≥ 65 years)          | 695 (68.7)                               | 1253 (68.6)    | 0.975          |
|                                       | Sex male                  | 644 (63.5)                               | 1089 (59.4)    | 0.033          |
|                                       | Current smoking           | 181 (18.1)                               | 367 (20.2)     | 0.170          |
|                                       | Alcohol abuse             | 123 (12.3)                               | 259 (14.3)     | 0.134          |
|                                       | Pneumococcal vaccine      | 149 (17)                                 | 318 (19.6)     | 0.118          |
|                                       | Influenza vaccine         | 370 (42.6)                               | 834 (51.1)     | <0.001         |
|                                       | Oral steroids             | 42 (4.2)                                 | 85 (4.7)       | 0.553          |
|                                       | Inhaled steroids          | 187 (18.8)                               | 380 (21.2)     | 0.142          |
|                                       | Antibiotic last month     | 202 (21.2)                               | 461 (26.6)     | 0.002          |
| <b>Comorbidity</b>                    | Cardiac disease           | 129 (12.8)                               | 280 (15.4)     | 0.064          |
|                                       | Chronic renal failure     | 78 (7.8)                                 | 140 (7.7)      | 0.928          |
|                                       | Liver disease             | 45 (4.5)                                 | 96 (5.3)       | 0.357          |
|                                       | Diabetes Mellitus         | 225 (22.6)                               | 441 (22.7)     | 0.949          |
|                                       | Chronic pulmonary disease | 350 (35.7)                               | 740 (41.3)     | 0.004          |
|                                       | Neurological disease      | 208 (21.1)                               | 366 (20.7)     | 0.814          |
| <b>Initial severity</b>               | Initial ICU admission     | 249 (24.6)                               | 337 (18.4)     | <0.001         |
|                                       | CURB65 (≥3)               | 181 (22.3)                               | 307 (19.9)     | 0.173          |
| <b>Complications and outcomes</b>     | Appropriate antibiotic    | 814 (95.3)                               | 1499 (96.1)    | 0.364          |
|                                       | Acute renal failure       | 303 (30.5)                               | 457 (25.4)     | 0.004          |
|                                       | Pleural effusion          | 139 (14.2)                               | 261 (14.6)     | 0.797          |
|                                       | Mechanical ventilation    | 126 (15.4)                               | 175 (11.8)     | 0.014          |
|                                       | ARDS                      | 56 (5.8)                                 | 67 (3.9)       | 0.024          |
|                                       | Septic shock              | 74 (7.5)                                 | 84 (4.7)       | 0.002          |
|                                       | Mortality at 30 days      | 116 (11.4)                               | 118 (6.4)      | <0.001         |

**Supplementary file 3: Clinical characteristics of patients in the single-site (validation) cohort depending on the lymphocyte count.** Data presented as n (%). ICU: Intensive care unit, ARDS: Acute Respiratory Distress Syndrome.
